# Supplementary material for: Blockade of exosome release alleviates the hypersensitive reaction by influencing the T helper cell population in cow's milk allergic mice
Source: Royal Society of Chemistry journal article supplement (doi:10.1039/d3fo05336a), 2024-01-01

**Figure S1** Analysis of morphological damage of the jejunum: (A) The H&E staining and toluidine blue staining of jejunum. The levels of MCP-1 (B) and IL-17A (C) of intestinal homogenized protein extract was detected by commercial kits. MCP-1, murine monocyte chemotactic protein-1; IL-17A, interleukins17A. The results are represented as the mean  $\pm$  SD (n = 3); \*  $p < 0.05$ , \*\*\*  $p < 0.01$ , as determined by one-way analysis of variance (ANOVA).

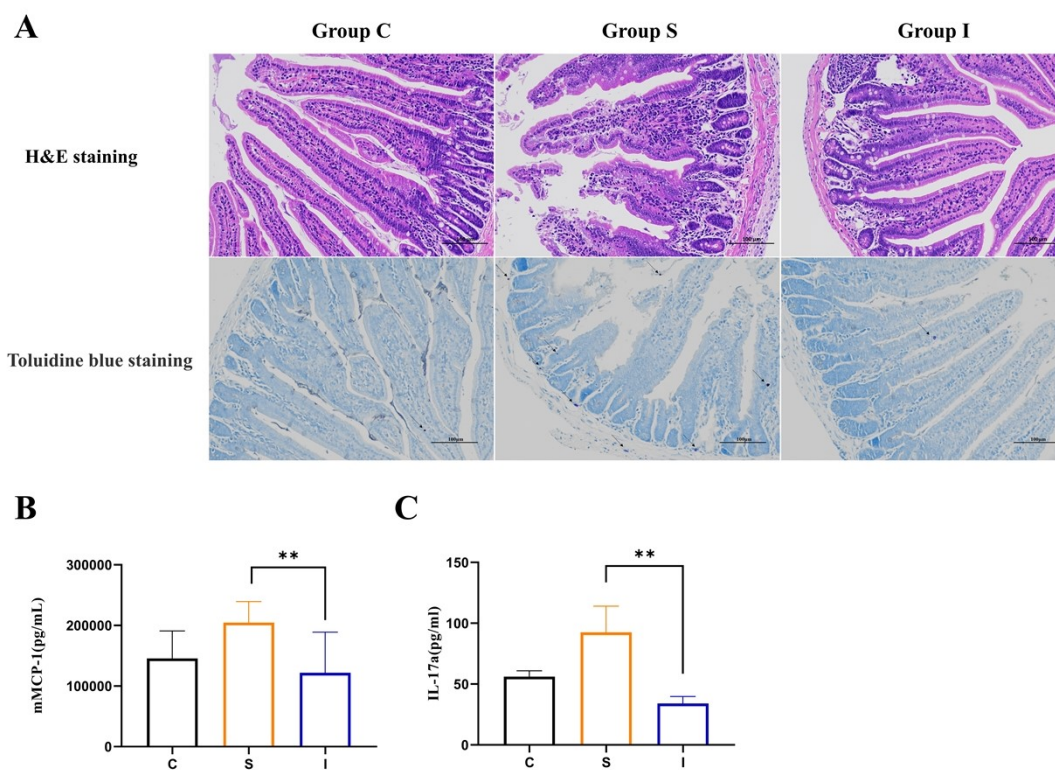

Supplement: d3fo05336a1.pdf [file d3fo05336a1.pdf]
